# Supplementary material
Source: PubMed Central journal article supplement (PMC7974834)
Supplement: jamaoncol-e210310-s003.pdf [file jamaoncol-e210310-s003.pdf]

## Data Sharing Statement

Mao. Effectiveness of Electroacupuncture or Auricular Acupuncture vs Usual Care for Chronic Musculoskeletal Pain Among Cancer Survivors. *JAMA Oncol*. Published March 18, 2021.  
doi:10.1001/jamaoncol.2021.0310

### Data

**Data available:** Yes

**Data types:** Deidentified participant data

**How to access data:** Susan Li, MS - [liq2@mskcc.org](mailto:liq2@mskcc.org)

**When available:** With publication

### Supporting Documents

**Document types:** Other (please specify)

**Additional Information:** Acupuncture protocols: Electroacupuncture Protocol and Auricular Acupuncture Protocol

**How to access documents:** Susan Li, MS - [liq2@mskcc.org](mailto:liq2@mskcc.org)

**When available:** With publication

### Additional Information

**Who can access the data:** Researchers whose proposed use of the data has been approved

**Types of analyses:** For a specified purpose

**Mechanisms of data availability:** With a signed data access agreement
